# Supplementary material
Source: PubMed Central journal article supplement (PMC3978812)

**Supplementary Table 1.** Virus particle to pfu ratios. Virus stocks were diluted using formulation buffer (10mM HEPES, 0.15M NaCl, 4% sucrose, pH 7.4) and particle numbers were determined using the qViro<sup>x</sup> virus counter (IZON, New Zealand).

|              | HSV-1 wt | HSV-1 dNLS | HSV-1 <i>dICP0</i> | HSV-2 wt | HSV-2 dNLS | HSV-2 <i>dICP0</i> |
|--------------|----------|------------|--------------------|----------|------------|--------------------|
| particle/ml  | 3.30E+10 | 3.00E+10   | 7.80E+10           | 4.00E+10 | 4.80E+10   | 4.60E+10           |
| pfu/ml       | 2.00E+09 | 1.27E+09   | 2.70E+09           | 2.00E+08 | 6.00E+08   | 2.00E+08           |
| particle/pfu | 16.500   | 23.622     | 28.889             | 200.000  | 80.000     | 230.000            |

**Supplementary figure 1.** HSV *dICP0* treated tumors have no significant differences in CD4<sup>+</sup> foxp3<sup>+</sup> Tregs infiltrating the tumors. Tumors were treated with three doses of HSV *dICP0*. Ten days after treatment the tumors were resected and CD45<sup>+</sup> immune cells isolated using EasySep magnetic bead positive selection. Cells were directly stained with the CD4<sup>+</sup> surface marker and foxp3<sup>+</sup> intracellular marker. The average and standard deviation of cell numbers were generated from 5 mice per each treatment group. ns, not significant

Supp. Fig 1

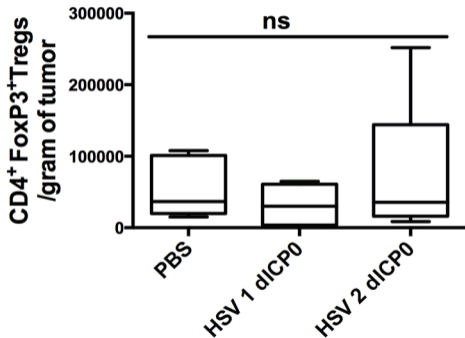

Supplement: mt2013238x1.pdf [file mt2013238x1.pdf]
